# Supplementary material for: Apheresis Efficacy and Tolerance in the Setting of HLA-Incompatible Kidney Transplantation
Source: PubMed Central journal article supplement (PMC8005077; doi:10.3390/jcm10061316), 2021-03-23

Supplementary Table 1: Mixed model modeling the effect of session type as a fixed and a random effect on DSA class I reduction

|                                                  | Fixed model                                                     |                                             | Mixed model                                                     |                                             | Variance<br>± SD                                         |
|--------------------------------------------------|-----------------------------------------------------------------|---------------------------------------------|-----------------------------------------------------------------|---------------------------------------------|----------------------------------------------------------|
| Inter-session MFI of immunodominant class I DSAs | Plasma exchange<br>Immunoabsorption<br>Volume of treated plasma | p=0.829<br><b>p=0.035</b><br><b>p=0.047</b> | Plasma exchange<br>Immunoabsorption<br>Volume of treated plasma | p=0.829<br><b>p=0.035</b><br><b>p=0.047</b> | 1x 10 <sup>-3</sup> ± 0.03<br>3x 10 <sup>-4</sup> ± 0.01 |

Supplementary Table 2 Mixed model modeling the effect of session type as a fixed and a random effect on DSA class II reduction

|                                                   | Fixed model                                                     |                                      | Mixed model                                                     |                                      | Variance<br>± SD   |
|---------------------------------------------------|-----------------------------------------------------------------|--------------------------------------|-----------------------------------------------------------------|--------------------------------------|--------------------|
| Inter-session MFI of immunodominant class II DSAs | Plasma exchange<br>Immunoabsorption<br>Volume of treated plasma | p=0.180<br>p=0.388<br><b>p=0.022</b> | Plasma exchange<br>Immunoabsorption<br>Volume of treated plasma | p=0.195<br>p=0.375<br><b>p=0.018</b> | 133 ± 11<br>22 ± 5 |

Supplementary Figure 1 : Percentage of IgM, IgA and IgG reduction post immunoabsorption alone or combined with membrane filtration

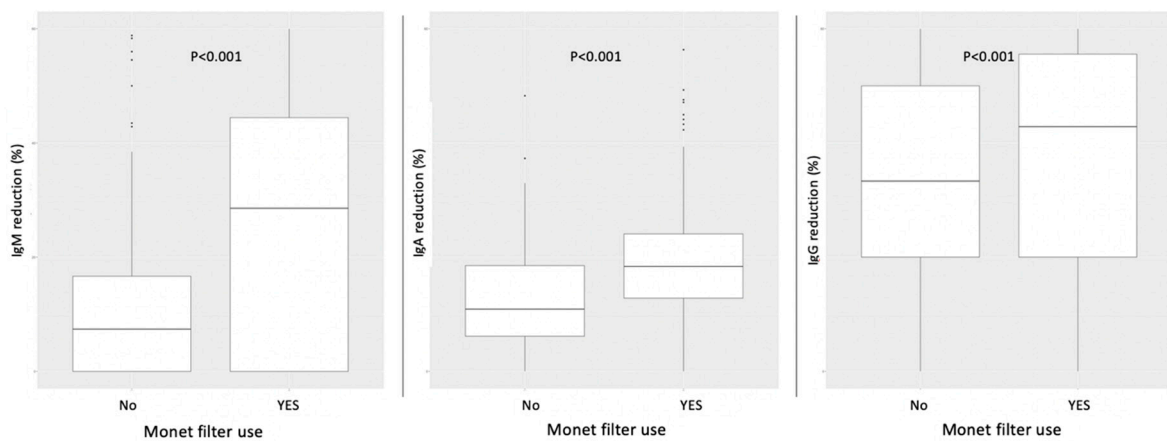

Supplement: jcm-10-01316-s001.pdf [file jcm-10-01316-s001.pdf]
